# Supplementary material for: A standardized patient-centered characterization of the phenotypic spectrum of PCDH19 girls clustering epilepsy
Source: PubMed Central journal article supplement (PMC7198503; doi:10.1038/s41398-020-0803-0), 2020-05-04
Supplement: 41398_2020_803_MOESM2_ESM.pdf [file 41398_2020_803_MOESM2_ESM.pdf]

## Supplementary Figures

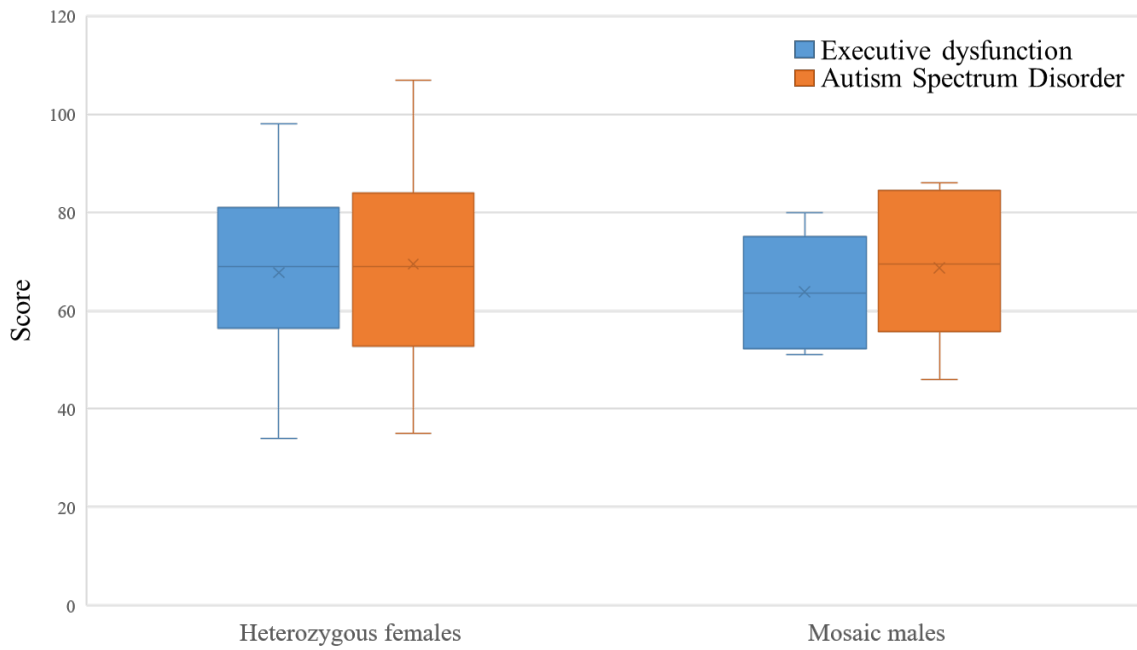

Figure 1. Boxplots illustrating average total BRIEF  $t$  scores (blue) for females ( $n = 89$ ) and males ( $n = 8$ ) and average total SRS-2  $t$  scores (orange) for females ( $n = 82$ ) and males ( $n = 8$ ).

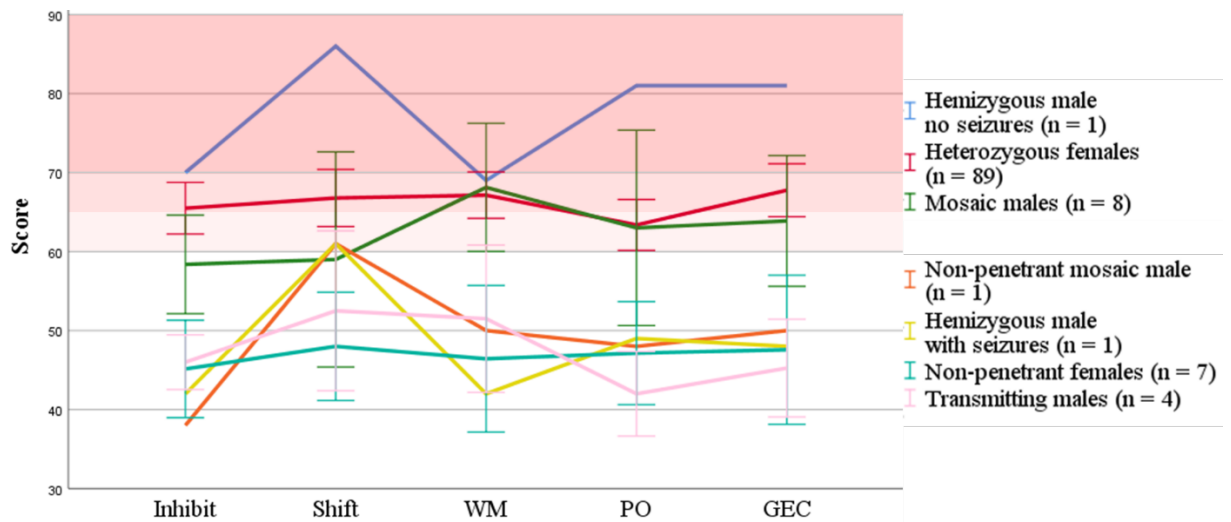

Figure 2. Average ( $\pm 2$  SEM) BRIEF total (GEC) and subscale  $t$  scores. Darkening shades of red correspond to increasing degrees of severity. *WM* working memory, *PO* plan/organize, *GEC* global executive composite.

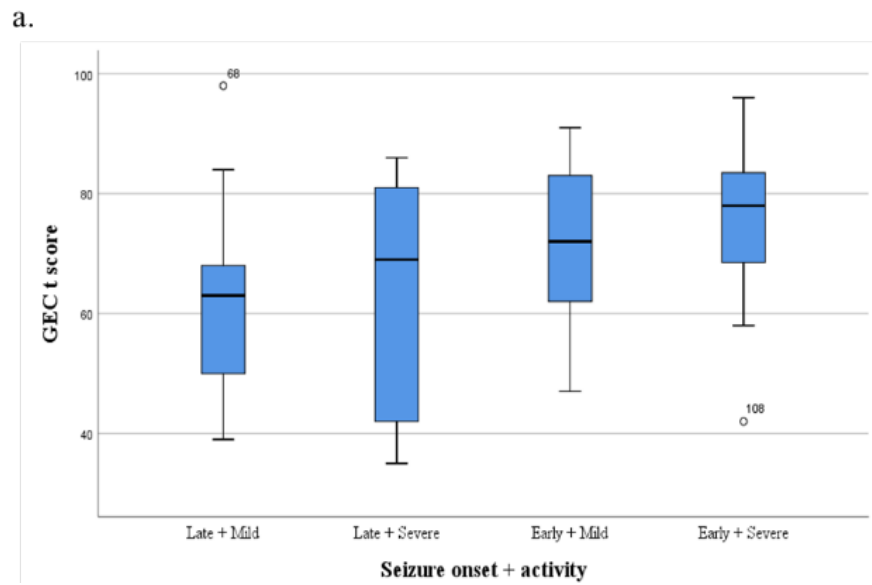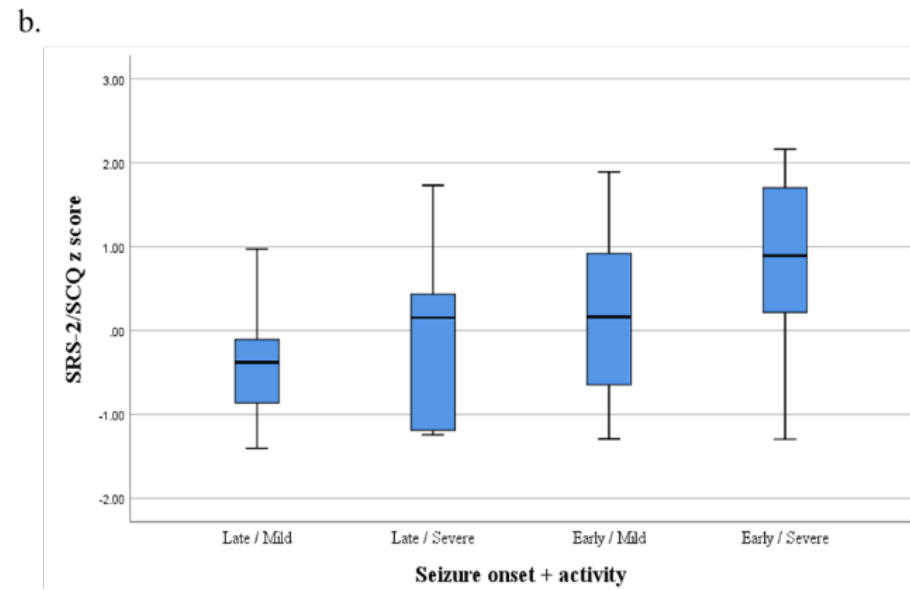

Figure 3. Association between seizure onset, seizure activity and clinical outcome: a) executive dysfunction measured by the BRIEF and b) ASD outcome measured by the SRS-2 or SCQ (scores converted to z scores for the analysis). *Early* =  $\leq 12$  months age at onset, *Late* =  $> 12$  months seizure onset, *Mild* =  $\leq 15$  average seizures/day, *Severe* =  $> 15$  average seizures/day.
