# Supplementary material for: A standardized patient-centered characterization of the phenotypic spectrum of PCDH19 girls clustering epilepsy
Source: PubMed Central journal article supplement (PMC7198503; doi:10.1038/s41398-020-0803-0), 2020-05-04
Supplement: 41398_2020_803_MOESM3_ESM.pdf [file 41398_2020_803_MOESM3_ESM.pdf]

Supplementary statistical output

a. Case processing based on clinical cut-off (<60) for the shift subscale on the SRS-2

*Statistics*

Is Shift score in clinical range

|   |         |    |
|---|---------|----|
| N | Valid   | 68 |
|   | Missing | 1  |

*Is Shift score in clinical range*

|         |        | Frequency | Percent | Valid Percent | Cumulative Percent |
|---------|--------|-----------|---------|---------------|--------------------|
| Valid   | No     | 10        | 14.5    | 14.7          | 14.7               |
|         | Yes    | 58        | 84.1    | 85.3          | 100.0              |
|         | Total  | 68        | 98.6    | 100.0         |                    |
| Missing | System | 1         | 1.4     |               |                    |
| Total   |        | 69        | 100.0   |               |                    |

b. Case processing based on clinical cut-off (<60) for the total score on the SRS-2 and shift subscale severity

*Case Processing Summary*

|                                         | Cases |         |         |         |       |         |
|-----------------------------------------|-------|---------|---------|---------|-------|---------|
|                                         | Valid |         | Missing |         | Total |         |
|                                         | N     | Percent | N       | Percent | N     | Percent |
| ASD clinical range (yes/no) * Shift_Sev | 68    | 98.6%   | 1       | 1.4%    | 69    | 100.0%  |

*ASD clinical range (yes/no) \* Shift\_Sev Crosstabulation*

Count

|                             |     | Shift_Sev     |              |             |              | Total |
|-----------------------------|-----|---------------|--------------|-------------|--------------|-------|
|                             |     | Average (<60) | Mild (60-64) | Mod (65-70) | Severe (>70) |       |
| ASD clinical range (yes/no) | Yes | 10            | 11           | 9           | 38           | 68    |
| Total                       |     | 10            | 11           | 9           | 38           | 68    |

c. Case processing based on clinical cut-off (<60) for the inhibit subscale on the SRS-2

*Statistics*

Is Inhibit score in clinical range

|   |         |    |
|---|---------|----|
| N | Valid   | 68 |
|   | Missing | 1  |

*Is Inhibit score in clinical range*

|         |        | Frequency | Percent | Valid Percent | Cumulative Percent |
|---------|--------|-----------|---------|---------------|--------------------|
| Valid   | No     | 14        | 20.3    | 20.6          | 20.6               |
|         | Yes    | 54        | 78.3    | 79.4          | 100.0              |
|         | Total  | 68        | 98.6    | 100.0         |                    |
| Missing | System | 1         | 1.4     |               |                    |
| Total   |        | 69        | 100.0   |               |                    |

d. Case processing based on clinical cut-off (<60) for the total score on the SRS-2 and inhibit subscale severity

*Case Processing Summary*

|                                              | Cases |         |         |         |       |         |
|----------------------------------------------|-------|---------|---------|---------|-------|---------|
|                                              | Valid |         | Missing |         | Total |         |
|                                              | N     | Percent | N       | Percent | N     | Percent |
| ASD clinical range (yes/no) *<br>Inhibit_Sev | 68    | 98.6%   | 1       | 1.4%    | 69    | 100.0%  |

*ASD clinical range (yes/no) \* Inhibit\_Sev Crosstabulation*

Count

|                             |     | Inhibit_Sev   |              |             |              |       |
|-----------------------------|-----|---------------|--------------|-------------|--------------|-------|
|                             |     | Average (<60) | Mild (60-64) | Mod (65-70) | Severe (>70) | Total |
| ASD clinical range (yes/no) | Yes | 14            | 8            | 15          | 31           | 68    |
| Total                       |     | 14            | 8            | 15          | 31           | 68    |

e. Case processing based on clinical severity for the shift and inhibit subscales

*Case Processing Summary*

|                         | Cases |         |         |         |       |         |
|-------------------------|-------|---------|---------|---------|-------|---------|
|                         | Valid |         | Missing |         | Total |         |
|                         | N     | Percent | N       | Percent | N     | Percent |
| Shift_Sev * Inhibit_Sev | 68    | 98.6%   | 1       | 1.4%    | 69    | 100.0%  |

*Shift\_Sev \* Inhibit\_Sev Crosstabulation*

Count

|           |                  | Inhibit_Sev   |              |             |              | Total |
|-----------|------------------|---------------|--------------|-------------|--------------|-------|
|           |                  | Average (<60) | Mild (60-64) | Mod (65-70) | Severe (>70) |       |
| Shift_Sev | Average (<60)    | 2             | 0            | 3           | 5            | 10    |
|           | Mild (60-64)     | 4             | 4            | 2           | 1            | 11    |
|           | Moderate (65-70) | 2             | 2            | 1           | 4            | 9     |
|           | Severe (>70)     | 6             | 2            | 9           | 21           | 38    |
| Total     |                  | 14            | 8            | 15          | 31           | 68    |

f. Case processing based on grouping clinical severity for the shift and inhibit subscales against the hyperactivity-inattention subscale as measured by the SDQ ("Hyp")

*Case Processing Summary*

|                                           | Cases |         |         |         |       |         |
|-------------------------------------------|-------|---------|---------|---------|-------|---------|
|                                           | Valid |         | Missing |         | Total |         |
|                                           | N     | Percent | N       | Percent | N     | Percent |
| Inhibit and shift combined severity * Hyp | 56    | 81.2%   | 13      | 18.8%   | 69    | 100.0%  |

*Inhibit and shift combined severity \* Hyperactivity-inattention scale from the SDQ score in clinical range (yes/no) ("Hyp") Crosstabulation*

Count

|                                     |                                 | Hyp |     |       |
|-------------------------------------|---------------------------------|-----|-----|-------|
|                                     |                                 | No  | Yes | Total |
| Inhibit and shift combined severity | Shift av/mild + Inhibit mod/sev | 2   | 8   | 10    |
|                                     | Shift mod/sev + Inhibit av/mild | 4   | 4   | 8     |
|                                     | Shift av/mild + Inhibit av/mild | 3   | 3   | 6     |
|                                     | Shift mod/sev + Inhibit mod/sev | 6   | 26  | 32    |
| Total                               |                                 | 15  | 41  | 56    |

g. Average SDQ hyperactivity-inattention subscale score as a measure of ADHD symptom severity for individuals grouped based on clinical cut-off (<60) for SRS-2 total score as a correlate of an ASD diagnosis

*Descriptive Statistics*

| ASD clinical (yes/no) |                                              | N  | Min | Max | Mean | Std. Deviation |
|-----------------------|----------------------------------------------|----|-----|-----|------|----------------|
| No                    | Hyperactivity-inattention scale from the SDQ | 18 | 0   | 9   | 4.78 | 2.579          |
| Yes                   | Hyperactivity-inattention scale from the SDQ | 56 | 0   | 10  | 6.95 | 2.235          |

h. Average SDQ hyperactivity-inattention subscale score as a measure of ADHD symptom severity for individuals grouped based on combined shift and inhibit subscale severity

*Descriptive Statistics*

| Inhibit and shift               |                                              | N  | Minimum | Maximum | Mean | Std. Deviation |
|---------------------------------|----------------------------------------------|----|---------|---------|------|----------------|
| Shift av/mild + Inhibit mod/sev | Hyperactivity-inattention scale from the SDQ | 11 | 4       | 10      | 7.09 | 2.166          |
| Shift mod/sev + Inhibit av/mild | Hyperactivity-inattention scale from the SDQ | 9  | 2       | 10      | 6.00 | 2.550          |
| Shift av/mild + Inhibit av/mild | Hyperactivity-inattention scale from the SDQ | 19 | 0       | 10      | 4.37 | 2.692          |
| Shift mod/sev + Inhibit mod/sev | Hyperactivity-inattention scale from the SDQ | 35 | 4       | 10      | 7.43 | 1.720          |

i. Case processing based on ASD and ADHD total score cut-offs

*Statistics*

*ADHD*

|     |   |         |    |
|-----|---|---------|----|
| No  | N | Valid   | 18 |
|     |   | Missing | 25 |
| Yes | N | Valid   | 56 |
|     |   | Missing | 13 |

*ADHD*

|       |         | ASD (yes/no) | Frequency | Percent | Valid Percent | Cumulative Percent |
|-------|---------|--------------|-----------|---------|---------------|--------------------|
| No    | Valid   | No           | 10        | 23.3    | 55.6          | 55.6               |
|       |         | Yes          | 8         | 18.6    | 44.4          | 100.0              |
|       |         | Total        | 18        | 41.9    | 100.0         |                    |
|       | Missing | System       | 25        | 58.1    |               |                    |
| Total |         |              | 43        | 100.0   |               |                    |
| Yes   | Valid   | No           | 15        | 21.7    | 26.8          | 26.8               |
|       |         | Yes          | 41        | 59.4    | 73.2          | 100.0              |
|       |         | Total        | 56        | 81.2    | 100.0         |                    |
|       | Missing | System       | 13        | 18.8    |               |                    |
|       | Total   |              |           | 69      | 100.0         |                    |
