# Supplementary material for: A standardized patient-centered characterization of the phenotypic spectrum of PCDH19 girls clustering epilepsy
Source: PubMed Central journal article supplement (PMC7198503; doi:10.1038/s41398-020-0803-0), 2020-05-04
Supplement: 41398_2020_803_MOESM4_ESM.pdf [file 41398_2020_803_MOESM4_ESM.pdf]

|     |       |     |     |     |     |   |     |        |                  |               |     |        |     |     |      |            |            |            |            |     |  |
|-----|-------|-----|-----|-----|-----|---|-----|--------|------------------|---------------|-----|--------|-----|-----|------|------------|------------|------------|------------|-----|--|
| 61  | TM    | 70  | NO  | N/A |     | 7 | N/A | N/A    | N/A              | N/A           | N/A | N/A    | N/A | N/A | N/A  | N/A        | N/A        | N/A        | N/A        | N/A |  |
| 62  | NP    | 47  | NO  | N/A |     | 7 | N/A | N/A    | N/A              | N/A           | N/A | N/A    | N/A | N/A | N/A  | N/A        | N/A        | N/A        | N/A        | N/A |  |
| 63  | MM(U) | 41  | NO  | N/A |     | 7 | N/A | N/A    | N/A              | N/A           | N/A | N/A    | N/A | N/A | N/A  | N/A        | N/A        | N/A        | N/A        | N/A |  |
| 64  | AF    | 31  | YES |     | 55  | 1 | NO  | N/A    | N/A              | N/A           | N/A | N/A    | 1   | 7   | 0    | 1/8/98     | YES        | Yearly     |            |     |  |
| 65  | TM    | 41  | NO  | N/A |     | 7 | N/A | N/A    | N/A              | N/A           | N/A | N/A    | N/A | N/A | N/A  | N/A        | N/A        | N/A        | N/A        | N/A |  |
| 66  | AF    | 2   | YES |     | 11  | 4 | NO  | N/A    | N/A              | N/A           | N/A | N/A    | 15  | 5   | 1    | 8/06/2018  | YES        | Weekly     |            |     |  |
| 67  | MM    | 2.5 | YES |     | 5   | 5 | NO  | N/A    | N/A              | N/A           | N/A | N/A    | 1   | 7   | 20   | 8/07/2018  | NO         | N/A        |            |     |  |
| 68  | AF    | 3   | YES |     | 24  | 5 | NO  | N/A    | N/A              | N/A           | N/A | N/A    | 7   | 10  | 30   | 1/06/2018  | NO         | N/A        |            |     |  |
| 69  | AF    | 3   | YES |     | 8   | 4 | NO  | N/A    | N/A              | N/A           | N/A | N/A    | 2   | 20  | 5    | 12/01/2018 | YES        | Infrequent |            |     |  |
| 70  | AF    | 2.5 | YES |     | 10  | 1 | YES | N/A    | N/A              | N/A           | N/A | N/A    | 6   | 14  | 6    | 1/02/2018  | NO         | N/A        |            |     |  |
| 71  | AF    | 6   | YES |     | 27  | 1 | NO  | N/A    | N/A              | N/A           | N/A | N/A    | 1   | 10  | 0    | 1/02/2015  | NO         | N/A        |            |     |  |
| 72  | MM    | 7   | YES |     | 10  | 5 | YES | N/A    | N/A              | N/A           | N/A | N/A    | 3   | 15  | 1    | 1/02/2018  | NO         | N/A        |            |     |  |
| 73  | AF    | 6   | YES |     | 14  | 4 | YES | N/A    | N/A              | N/A           | N/A | N/A    | 3   | 6   | 0    | 24/06/2015 | YES        | Once       |            |     |  |
| 74  | AF    | 7   | YES |     | 11  | 3 | NO  | N/A    | N/A              | N/A           | N/A | N/A    | 4   | 8   | 0    | 1/02/2015  | YES        | Infrequent |            |     |  |
| 75  | AF    | 6   | YES |     | 9   | 1 | NO  | N/A    | N/A              | N/A           | N/A | N/A    | 3   | 4   | 0    | 1/08/2017  | YES        | Monthly    |            |     |  |
| 76  | AF    | 10  | YES |     | 11  | 2 | YES | N/A    | N/A              | N/A           | N/A | N/A    | 2   | 14  | 0    | 1/08/2014  | YES        | Twice      |            |     |  |
| 77  | AF    | 8   | YES |     | 13  | 5 | NO  | N/A    | N/A              | N/A           | N/A | N/A    | 2   | 10  | 2    | 24/05/2016 | YES        | Once       |            |     |  |
| 78  | AF    | 8   | YES |     | 8   | 5 | YES | N/A    | N/A              | N/A           | N/A | N/A    | 15  | 20  | 40   | 10/03/2018 | NO         | N/A        |            |     |  |
| 79  | AF    | 9   | YES |     | 8   | 5 | NO  | YES    | Every 3-4 months | 60+ minutes   | YES | YES    | 4   | 20  | 4    | 1/01/2018  | NO         | N/A        |            |     |  |
| 80  | AF    | 8   | YES |     | 6   | 5 | NO  | N/A    | N/A              | N/A           | N/A | N/A    | 24  | 10  | 3    | 1/03/2018  | YES        | Yearly     |            |     |  |
| 81  | AF    | 17  | YES |     | 5   | 5 | NO  | YES    | N/A              | N/A           | N/A | N/A    | 2   | 8   | 0    | 1/02/2016  | YES        | Infrequent |            |     |  |
| 82  | AF    | 17  | YES |     | 7   | 5 | YES | YES    | Once             | 40-50 minutes | YES | NO     | 5   | 30  | 0    | 1/04/2015  | YES        | Yearly     |            |     |  |
| 83  | AF    | 16  | YES |     | 6   | 5 | YES | YES    | Twice            | 30-40 minutes | YES | NO     | 6   | 30  | 2    | 1/10/2017  | YES        | Yearly     |            |     |  |
| 84  | AF    | 17  | YES |     | 15  | 5 | YES | NO     | N/A              | N/A           | N/A | N/A    | 2   | 4   | 21   | 1/10/2018  | YES        | Infrequent |            |     |  |
| 85  | AF    | 13  | YES |     | 7   | 4 | NO  | NO     | N/A              | N/A           | N/A | N/A    | 1   | 25  | 6    | 21/03/2018 | YES        | Monthly    |            |     |  |
| 86  | AF    | 15  | YES |     | 2.5 | 5 | NO  | NO     | N/A              | N/A           | N/A | N/A    | 14  | 8   | 0    | 1/01/2012  | YES        | Yearly     |            |     |  |
| 87  | AF    | 27  | YES |     | 7   | 5 | NO  | NO     | N/A              | N/A           | N/A | N/A    | NO  | N/A | N/A  | 30/9/18    | YES        | Weekly     |            |     |  |
| 88  | AF    | 43  | YES |     | 9   | 5 | NO  | NO     | N/A              | N/A           | N/A | N/A    | YES | 1   | 5    | 0          | 1/1/13     | YES        | Monthly    |     |  |
| 89  | AF    | 21  | YES |     | 5   | 5 | YES | NO     | N/A              | N/A           | N/A | N/A    | YES | 1   | 7    | 2          | 1/10/17    | NO         | N/A        |     |  |
| 90  | AF    | 21  | YES |     | 16  | 5 | YES | NO     | N/A              | N/A           | N/A | N/A    | YES | 2   | 10   | 0          | 24/7/03    | NO         | N/A        |     |  |
| 91  | AF    | 18  | YES |     | 11  | 5 | NO  | NO     | N/A              | N/A           | N/A | N/A    | YES | 3   | 30   | 0          | 19/02/2008 | NO         | N/A        |     |  |
| 92  | AF    | 25  | YES |     | 9   | 5 | YES | NO     | N/A              | N/A           | N/A | N/A    | NO  | N/A | N/A  | 1/3/08     | YES        | Infrequent |            |     |  |
| 93  | NP    | 45  | YES |     | 3   | 0 | NO  | NO     | N/A              | N/A           | N/A | N/A    | NO  | N/A | N/A  | 1/8/72     | YES        | Once       |            |     |  |
| 94  | AF    | 52  | YES |     | 8   | 6 | NO  | UNSURE | N/A              | N/A           | N/A | N/A    | YES |     | 0    | UNSURE     | UNSURE     | N/A        |            |     |  |
| 95  | AF    | 23  | YES |     | 8   | 6 | YES | YES    | Yearly           | 60+ minutes   | YES | YES    | 4   |     | 0    | 9/5/16     | YES        | Once       |            |     |  |
| 96  | TM    | 51  | NO  | N/A |     | 7 | N/A | N/A    | N/A              | N/A           | N/A | N/A    | N/A | N/A | N/A  | N/A        | N/A        | N/A        | N/A        | N/A |  |
| 97  | NP    | 54  | NO  | N/A |     | 7 | N/A | N/A    | N/A              | N/A           | N/A | N/A    | N/A | N/A | N/A  | N/A        | N/A        | N/A        | N/A        | N/A |  |
| 98  | AF    | 25  | YES |     | 30  | 5 | NO  | NO     | N/A              | N/A           | N/A | N/A    | YES | 15  | 20   | 0          | 1/1/04     | NO         | N/A        |     |  |
| 99  | NP    | 57  | NO  | N/A |     | 7 | N/A | N/A    | N/A              | N/A           | N/A | N/A    | N/A | N/A | N/A  | N/A        | N/A        | N/A        | N/A        | N/A |  |
| 100 | AF    | 10  | YES |     | 11  | 5 | YES | NO     | N/A              | N/A           | N/A | N/A    | YES | 1   | 3    | 0          | 1/1/16     | YES        | Daily      |     |  |
| 101 | AF    | 6   | YES |     | 16  | 5 | NO  | NO     | N/A              | N/A           | N/A | N/A    | YES | 5   | 30   | 0          | 1/10/17    | NO         | N/A        |     |  |
| 102 | AF    | 6   | YES |     | 7   | 5 | YES | NO     | N/A              | N/A           | N/A | N/A    | YES | 2   | 7    | 5          | 26/8/18    | NO         | N/A        |     |  |
| 103 | AF    | 7   | YES |     | 3.5 | 5 | YES | NO     | N/A              | N/A           | N/A | N/A    | YES | 3   | 15   | 10         | 1/8/18     | YES        | Yearly     |     |  |
| 104 | AF    | 5   | YES |     | 14  | 5 | YES | YES    | Twice            | 50-60 minutes | YES | NO     | 2   | 10  | 5    | 1/3/18     | NO         | N/A        |            |     |  |
| 105 | AF    | 7   | YES |     | 10  | 5 | YES | NO     | N/A              | N/A           | N/A | N/A    | YES | 5   | 10   | 3          | 16/7/18    | YES        | Infrequent |     |  |
| 106 | AF    | 14  | YES |     | 4   | 5 | YES | NO     | N/A              | N/A           | N/A | N/A    | YES | 2   | 6    | 2          | 1/5/18     | NO         | N/A        |     |  |
| 107 | AF    | 12  | YES |     | 22  | 5 | YES | NO     | N/A              | N/A           | N/A | N/A    | YES | 7   | 5    | 0          | 1/1/10     | NO         | N/A        |     |  |
| 108 | AF    | 32  | YES |     | 1.5 | 0 | NO  | NO     | N/A              | N/A           | N/A | N/A    | YES | 4   | 20   | 0          | 1/2/10     | NO         | N/A        |     |  |
| 109 | AF    | 23  | YES |     | 22  | 5 | YES | NO     | N/A              | N/A           | N/A | N/A    | YES | 3   |      | 0          | 19/12/08   | YES        | Twice      |     |  |
| 110 | AF    | 23  | YES |     | 18  | 5 | YES | NO     | N/A              | N/A           | N/A | N/A    | YES | 1   | Many | 0          | 1/1/06     | NO         | N/A        |     |  |
| 111 | AF    | 33  | YES |     | 18  | 5 | NO  | YES    | Yearly           | 30-40 minutes | YES | UNSURE | YES | 1   | 3    | 0          | 1/1/02     | NO         | N/A        |     |  |
| 112 | MM    | 12  | YES |     | 96  | 5 | NO  | NO     | N/A              | N/A           | N/A | N/A    | YES | 1   | 5    | 50         |            | YES        | Yearly     |     |  |
