# Supplementary material for: A standardized patient-centered characterization of the phenotypic spectrum of PCDH19 girls clustering epilepsy
Source: PubMed Central journal article supplement (PMC7198503; doi:10.1038/s41398-020-0803-0), 2020-05-04
Supplement: 41398_2020_803_MOESM5_ESM.pdf [file 41398_2020_803_MOESM5_ESM.pdf]

## Supplementary Tables

Table 1. Reliability coefficients for SDQ Parent-Report scores

|           |                           | Cronbach $\alpha$ |
|-----------|---------------------------|-------------------|
| SDQ scale | Total difficulties        | .71               |
|           | Emotional symptoms        | .77               |
|           | Conduct problems          | .63               |
|           | Hyperactivity-inattention | .67               |
|           | Peer problems             | .66               |
|           | Prosocial behavior        | .83               |
|           | Impact                    | .86               |

*SDQ* Strengths and Difficulties Questionnaire

Table 2. *In silico* assessment of all novel *PCDH19* variants in our cohort

| #          | Country     | Position    | NM_001184880.1         | Mode of inheritance                  | CADD (P≥25)              | gnomAD frequency | GPP (P≥0.1)          | Mut Pred rank (P≥0.68) | MutationAssessor rank (P≥0.59) | PROVEAN (P≤-2.5) | Polyphen2 | SIFT | Prediction    |                   |
|------------|-------------|-------------|------------------------|--------------------------------------|--------------------------|------------------|----------------------|------------------------|--------------------------------|------------------|-----------|------|---------------|-------------------|
| Missense   | 7           | Denmark     | 99661786               | c.1810A>C; p.Thr604Pro               | <i>De novo</i>           | 24.2             | Absent               | 0.1560795              | 0.722                          | 0.895            | -3.68     | D    | Del           | Likely Pathogenic |
|            | 8           | Australia   | 99663098-99663100      | c.496_498AAA; p.Tyr166Lys            | <i>De novo</i>           | NC               | Absent               | NC                     | 0.896                          | NC               | -8.199    | D    | NC            | Likely Pathogenic |
|            | 16          | Moldova     | 99663003               | c.593G>C; p.Arg198Pro (mosaic)       | <i>De novo</i>           | 31               | Absent               | 0.4938962              | 0.927                          | 0.987            | -6.44     | D    | Del           | Likely Pathogenic |
|            | 23          | USA         | 99662127               | c.1469A>C; p.Tyr490Ser               | <i>De novo</i>           | 25.6             | Absent               | 0.9081805              | 0.919                          | 0.991            | -8.43     | D    | Del           | Likely Pathogenic |
|            | 26,56       | Denmark     | 99662797               | c.799G>A; p.Glu267Lys                | Maternal, Paternal       | 33               | Absent               | 0.1402426              | 0.887                          | 0.771            | -3.59     | D    | Del           | Likely Pathogenic |
|            | 27          | Denmark     | 99662127               | c.1469A>G; p.Tyr490Cys               | Paternal                 | 24.5             | Absent               | 0.8659184              | 0.908                          | 0.978            | -8.43     | D    | Del           | Likely Pathogenic |
|            | 30          | UK          | 99662908               | c.688G>C; p.Asp230His (mosaic)       | <i>De novo</i>           | 27.5             | Absent               | 0.9995749              | 0.888                          | 0.999            | -6.19     | D    | Del           | Likely Pathogenic |
|            | 40          | New Zealand | 99661677               | c.1919T>G; p.Leu640Arg               | <i>De novo</i>           | 25.1             | Absent               | 0.0750358              | 0.87                           | 0.972            | -5.26     | D    | Del           | Likely Pathogenic |
|            | 44          | USA         | 99662994               | c.602A>C; p.Gln201Pro                | <i>De novo</i>           | 24.4             | Absent               | 0.1126678              | 0.686                          | 0.897            | -4.9      | D    | Del           | Likely Pathogenic |
|            | 67          | Italy       | 99662576               | c.1020T>A; p.Asn340Lys (mosaic)      | <i>De novo</i>           | 23.9             | Absent               | 0.5263762              | 0.915                          | 0.998            | -5.51     | D    | Del           | Likely Pathogenic |
|            | 69          | Italy       | 99661654               | c.1942G>C; p.Gly648Arg               | <i>De novo</i>           | 28.6             | Absent               | 0.9850428              | 0.866                          | 0.913            | -7.06     | D    | Del           | Likely Pathogenic |
|            | 73          | Italy       | 99662925               | c.671T>A; p.Leu224His                | <i>De novo</i>           | 24.5             | Absent               | 0.9962677              | 0.81                           | 0.94             | -5.3      | D    | Del           | Likely Pathogenic |
|            | 78          | Italy       | 99551837               | c.2885G>A; p.Arg962Gln               | Unknown                  | 32               | 0.0000056 (1 x male) | 0.0001695              | 0.657                          | 0.758            | -1.92     | D    | Del           | Likely Pathogenic |
|            | 85          | Italy       | 99662817               | c.779T>G; p.Leu260Arg                | <i>De novo</i>           | 25.8             | Absent               | 0.9746687              | 0.959                          | 0.959            | -5.53     | D    | Del           | Likely Pathogenic |
|            | 89,97,98,99 | Italy       | 99661623               | c.1973T>G; p.Val658Gly               | Maternal (3)<br>Unknown  | 23.4             | Absent               | 0.8591691              | 0.587                          | 0.819            | -4.08     | P    | Del           | Likely Pathogenic |
|            | 90,96       | Italy       | 99662133               | c.1463T>A; p.Val488Asp               | Paternal, Unknown        | 26               | Absent               | 0.3091389              | 0.912                          | 0.987            | -5.88     | D    | Del           | Likely Pathogenic |
|            | 91          | Italy       | 99663460               | c.136G>C; p.Ala46Pro                 | Paternal                 | 25.3             | Absent               | 5.81E-05               | 0.884                          | 0.355            | -1.5      | D    | Tol           | Likely Pathogenic |
|            | 111         | France      | 99662628               | c.968C>T; p.Pro323Leu                | Paternal                 | 26.1             | Absent               | 0.5317213              | 0.803                          | 0.132            | -8.44     | D    | Del           | Likely Pathogenic |
| Ex         | USA         | 99658583    | c.2227T>A; p.Ser743Thr | Maternal (2),<br>Unknown             | 6.798                    | 0.0000115        | 8.40E-10             | 0.157                  | 0.065                          | 0.14             | B         | Tol  | Likely Benign |                   |
| Nonsense   | 11          | Argentina   | 99661876               | c.1720G>T; p.Glu574* (mosaic)        | <i>De novo</i>           | 37               | Absent               | NC                     | NC                             | NC               | NC        | NC   | NC            | Likely Pathogenic |
|            | 59          | Netherlands | 99657726               | c.2412C>A; p.Cys804*                 | Unknown                  | 38               | Absent               | NC                     | NC                             | NC               | NC        | NC   | NC            | Likely Pathogenic |
|            | 70          | Italy       | 99662844               | c.752C>A; p.Ser251*                  | <i>De novo</i>           | 41               | Absent               | NC                     | NC                             | NC               | NC        | NC   | NC            | Likely Pathogenic |
|            | 107         | France      | 99663544               | c.52C>T; p.Gln18*                    | <i>De novo</i>           | 36               | Absent               | NC                     | NC                             | NC               | NC        | NC   | NC            | Likely Pathogenic |
|            | 112         | USA         | 99662048               | c.1548C>A; p.Tyr516*                 | Unknown                  | 32               | Absent               | NC                     | NC                             | NC               | NC        | NC   | NC            | Likely pathogenic |
| Frameshift | 3           | Russia      | 99662500               | c.1095_1096insG;<br>p.Tyr366Valfs*10 | <i>De novo</i>           | NC               | Absent               | NC                     | NC                             | NC               | NC        | NC   | NC            | Possibly Damaging |
|            | 4,52        | Russia      | 99662982               | c.614del; p.Ser205Thrfs*7            | Maternal, <i>De novo</i> | NC               | Absent               | NC                     | NC                             | NC               | NC        | NC   | NC            | Possibly Damaging |
|            | 35          | USA         | 99663061-99663088      | c.518_525del; p.Leu173Profs*50       | <i>De novo</i>           | NC               | Absent               | NC                     | NC                             | NC               | NC        | NC   | NC            | Possibly Damaging |
|            | 66          | Italy       | 99662139               | c.1457del; p.Gly486Alafs*83          | <i>De novo</i>           | NC               | Absent               | NC                     | NC                             | NC               | NC        | NC   | NC            | Possibly Damaging |
|            | 71          | Italy       | 99661880-99661886      | c.1710_1716del; p.Asn570Lysfs*12     | <i>De novo</i>           | NC               | Absent               | NC                     | NC                             | NC               | NC        | NC   | NC            | Possibly Damaging |
|            | 87          | Italy       | 99662437               | c.1159delC; p.Arg387Valfs*135        | Unknown                  | NC               | Absent               | NC                     | NC                             | NC               | NC        | NC   | NC            | Possibly Damaging |
|            | 100         | France      | 99662625               | c.971del; p.Asn324Ilefs*44           | Maternal                 | NC               | Absent               | NC                     | NC                             | NC               | NC        | NC   | NC            | Possibly Damaging |
|            | 101         | France      | 99661637-99661638      | c.1958_1959del; p.Ser653Cysfs*64     | <i>De novo</i>           | NC               | Absent               | NC                     | NC                             | NC               | NC        | NC   | NC            | Possibly Damaging |
|            | 104         | Canada      | 99657637               | c.2501dup; p.Asn834Lysfs*13          | Unknown                  | NC               | Absent               | NC                     | NC                             | NC               | NC        | NC   | NC            | Possibly Damaging |
|            | 110         | France      | 99662851               | c.745del; p.Glu249Lysfs*56           | <i>De novo</i>           | NC               | Absent               | NC                     | NC                             | NC               | NC        | NC   | NC            | Possibly Damaging |
| Dup        | 5,10,64     | USA         | 99663146-99663151      | c.445_450dup;<br>p.Pro149_Leu150dup  | Maternal (2),<br>Unknown | NC               | Absent               | NC                     | NC                             | NC               | -9.85     | NC   | NC            | Possibly Damaging |
|            | Splice      | 22          | UK                     | 99551874                             | c.2849-1G>C; p.?         | Unknown          | 33                   | Absent                 | NC                             | NC               | NC        | NC   | NC            | NC                |

D probably damaging, P possibly damaging, B benign, Del deleterious, Tol tolerated, N neutral, L low, M medium, H high, Dup duplication, NC not covered, NB: red text highlights benign scores, Ex refers to the excluded variant

Table 3. *In silico* assessment of all non-PCDH19 variants in our cohort

| Participant     | PCDH19                           | Secondary findings                    | Position                              | Mode of inheritance | CADD (P≥25)    | gnomAD frequency | Mut Pred rank (P≥0.68) | MutationAssessor rank (P≥0.59) | PROVEAN (P≤-2.5) | Polyphen2    | SIFT | Prediction        |                   |
|-----------------|----------------------------------|---------------------------------------|---------------------------------------|---------------------|----------------|------------------|------------------------|--------------------------------|------------------|--------------|------|-------------------|-------------------|
| Non-PCDH19      | 1                                | STRADA: c.1144-1G>A; p.?              | 63703741                              | Unknown             | NC             | Absent           | NC                     | NC                             | NC               | NC           | NC   | Possibly Damaging |                   |
|                 |                                  | <i>TPK1</i> : c.337G>A;p.Glu113Lys    | 144320276                             | Unknown             | 17.53          | Absent           | 0.2                    | 0.094                          | -0.04            | B            | Tol  | Likely Benign     |                   |
|                 | 2                                | c.1335C>G; p.Asp445Glu                | <i>KANSL1</i> : c.53T>C; p.Ile8Thr    | 44249457            | Unknown        | 24.8             | Absent                 | 0.362                          | 0.225            | -0.117647059 | D    | Del               | Possibly Damaging |
|                 | 5 <sup>#</sup>                   | c.445_450dup; p.Pro149_Leu150dup      | <i>CHRNA4</i> : c.1183G>A;p.Val395Ile | 61981052            | Maternal       | 15.1             | 0.0002254              | 0.15                           | 0.646            | -0.8         | D    | Tol               | Likely Benign     |
|                 | 6                                | c.2656C>T; p.Arg886* (mosaic)         | <i>WWOX</i> : c.1057C>A;p.Gln353Lys   | 79245505            | <i>De novo</i> | 23.3             | 0.00001206             | 0.71                           | NC               | -1.72        | P    | Tol               | Likely Benign     |
|                 |                                  |                                       | <i>ZEB2</i> : c.225C>T;p.Ser75=       | 145187442           | <i>De novo</i> | NC               | 0.00003186             | NC                             | NC               | NC           | NC   | NC                | Likely Benign     |
|                 | 10 <sup>#</sup>                  | c.445_450dup; p.Pro149_Leu150dup      | <i>CHRNA4</i> : c.1183G>A;p.Val395Ile | 61981052            | Maternal       | 15.1             | 0.0002254              | 0.15                           | 0.646            | -0.8         | D    | Tol               | Likely Benign     |
| 30              | c.688G>C; p.Asp230His (mosaic)   | <i>SCN9A</i> : c.2215A>G;p.Ile739Val  | 167136962                             | <i>De novo</i>      | 18.02          | 0.00247          | 0.654                  | 0.8                            | -0.89            | P            | Del  | Likely Benign     |                   |
| 64 <sup>#</sup> | c.445_450dup; p.Pro149_Leu150dup | <i>CHRNA4</i> : c.1183G>A;p.Val395Ile | 61981052                              | Unknown             | 15.1           | 0.0002254        | 0.15                   | 0.646                          | -0.8             | D            | Tol  | Likely Benign     |                   |

CADD Combined Annotation Dependent Depletion, PROVEAN Protein Variation Effect Analyzer, Polyphen2 Polymorphism Phenotyping v2, SIFT Sorting Intolerance from Tolerance, D probably damaging, P possibly damaging, B benign, Del deleterious, Tol tolerated, N neutral, NC not covered, NB: red text highlights benign scores and # represent a mother and her two daughters

Table 4. Development frequencies (and percentages)

a. Early development based on parent/caregiver-report ( $n = 83$ )

|                                   | Heterozygous<br>females (%) $n = 73$ | Mosaic<br>males (%) $n = 8$ | Hemizygous<br>Males (%) $n = 2$ |
|-----------------------------------|--------------------------------------|-----------------------------|---------------------------------|
| <b>Developmental delay</b>        | 43/73 (59)                           | 6/8 (75)                    | 1/2 (50)                        |
| -Prior to seizure onset           | 13/43 (30)                           | 2/6 (33)                    | N/A                             |
| <b>Regression</b>                 | 31/73 (42)                           | 4/8 (50)                    | 2/2 (100)                       |
| - $\geq 5$ episodes of regression | 17/31 (55)                           | 3/4 (75)                    | 1/2 (50)                        |
| -Following seizure cluster        | 27/31 (87)                           | 2/4 (50)                    | 1/2 (50)                        |
| -Following status epilepticus     | 5/31 (16)                            | 0/4 (0)                     | 0/2 (0)                         |

b. Intellect based on self- or patient/caregiver-report ( $n = 111$ )

|                         | Heterozygous females     |                              | Mosaic males            |                              | Hemizygous males        |                             |
|-------------------------|--------------------------|------------------------------|-------------------------|------------------------------|-------------------------|-----------------------------|
|                         | Affected<br>( $n = 89$ ) | Non-penetrant<br>( $n = 7$ ) | Affected<br>( $n = 8$ ) | Non-penetrant<br>( $n = 1$ ) | Affected<br>( $n = 2$ ) | Transmitting<br>( $n = 4$ ) |
| Normal intelligence     | 45                       | 7                            | 4                       | 1                            | 1                       | 4                           |
| Borderline intelligence | 3                        | 0                            | 1                       | 0                            | 0                       | 0                           |
| Mild ID                 | 18                       | 0                            | 1                       | 0                            | 1                       | 0                           |
| Moderate ID             | 9                        | 0                            | 0                       | 0                            | 0                       | 0                           |
| Severe ID               | 12                       | 0                            | 2                       | 0                            | 0                       | 0                           |
| Profound ID             | 2                        | 0                            | 0                       | 0                            | 0                       | 0                           |

ID intellectual disability

Table 5. Frequencies (and percentages) of Strengths and Difficulties Questionnaire (SDQ) domain and impact scores for affected individuals

a. Heterozygous females ( $n = 65$ )

| SDQ score classification | SDQ Domains        |                  |                         |               |                    |
|--------------------------|--------------------|------------------|-------------------------|---------------|--------------------|
|                          | Emotional Problems | Conduct Problems | Hyperactive-Inattention | Peer Problems | Prosocial Behavior |
| Average                  | 35 (54)            | 25 (38.5)        | 22 (34)                 | 19 (29.5)     | 17 (26)            |
| Mild                     | 12 (18)            | 13 (20)          | 15 (23)                 | 6 (9)         | 9 (14)             |
| Moderate                 | 7 (11)             | 16 (24.5)        | 11 (17)                 | 6 (9)         | 7 (11)             |
| Severe                   | 11 (17)            | 11 (17)          | 17 (26)                 | 34 (52.5)     | 32 (49)            |

b. Mosaic males ( $n = 8$ )

| SDQ score classification | SDQ Domains        |                  |                         |               |                    |
|--------------------------|--------------------|------------------|-------------------------|---------------|--------------------|
|                          | Emotional Problems | Conduct Problems | Hyperactive-Inattention | Peer Problems | Prosocial Behavior |
| Average                  | 6 (75)             | 4 (50)           | 2 (25)                  | 2 (25)        | 0 (0)              |
| Mild                     | 0 (0)              | 2 (25)           | 3 (37.5)                | 0 (0)         | 2 (25)             |
| Moderate                 | 1 (12.5)           | 1 (12.5)         | 2 (25)                  | 2 (25)        | 0 (0)              |
| Severe                   | 1 (12.5)           | 1 (12.5)         | 1 (12.5)                | 4 (50)        | 6 (75)             |

c. Impact scores ( $n = 73$ )

| SDQ score classification | Heterozygous females ( $n = 65$ ) | Mosaic Males ( $n = 8$ ) |
|--------------------------|-----------------------------------|--------------------------|
| Average                  | 9 (14)                            | 1 (12.5)                 |
| Mild                     | 6 (9)                             | 1 (12.5)                 |
| Moderate                 | 3 (5)                             | 0 (0)                    |
| Severe                   | 47 (72)                           | 6 (75)                   |

Table 6. Descriptive statistics for all neuropsychiatric measures

| Group                 | Measure | N  | Min | Max | Mean  | SD   |
|-----------------------|---------|----|-----|-----|-------|------|
| Heterozygous females  | SRS-2   | 82 | 35  | 107 | 69.5* | 18.6 |
|                       | SCQ     | 8  | 8   | 32  | 18.5* | 8.12 |
|                       | SDQ     | 65 | 3   | 31  | 17.6* | 6.68 |
|                       | BRIEF   | 89 | 34  | 98  | 67.8* | 15.8 |
|                       | DOCS    | 17 | 0   | 33  | 11.4  | 10.7 |
| Mosaic males          | SRS-2   | 8  | 46  | 86  | 68.8* | 15.1 |
|                       | SDQ     | 8  | 8   | 29  | 16.5* | 6.28 |
|                       | BRIEF   | 8  | 51  | 80  | 63.9* | 11.7 |
| Non-penetrant females | SRS-2   | 7  | 41  | 70  | 47.7  | 10.1 |
|                       | BRIEF   | 7  | 39  | 75  | 47.6  | 12.5 |
|                       | DOCS    | 7  | 0   | 46  | 11.1  | 16.3 |
| Transmitting males    | SRS-2   | 4  | 41  | 51  | 46.3  | 4.99 |
|                       | BRIEF   | 4  | 38  | 53  | 45.3  | 6.19 |
|                       | DOCS    | 4  | 0   | 15  | 5.25  | 6.70 |

\*Represents group averages above the clinical threshold

Table 7. Average scores on measures of executive dysfunction and ASD based on seizure onset and activity

| Group          | <i>N</i> | BRIEF GEC <i>t</i> score | SRS-2/SCQ combined <i>z</i> score |
|----------------|----------|--------------------------|-----------------------------------|
| Late / Mild    | 22       | 61.0                     | -0.35                             |
| Late / Severe  | 6        | 63.7                     | 0.01                              |
| Early / Mild   | 33       | 71.8                     | 0.17                              |
| Early / Severe | 24       | 75.3                     | 0.85                              |

Table 8. Genotype-phenotype associations

| Dependent variable               | Independent variable | <i>N</i> | Mean  | Std. Deviation | Significance    |
|----------------------------------|----------------------|----------|-------|----------------|-----------------|
| BRIEF <i>t</i> score             | Non-truncating       | 59       | 61.8  | 16.1           | <i>p</i> = .067 |
|                                  | Truncating           | 38       | 68.1  | 17.0           |                 |
| ASD <i>z</i> score (SRS-2 & SCQ) | Non-truncating       | 59       | -0.12 | 0.98           | <i>p</i> = .738 |
|                                  | Truncating           | 38       | -0.05 | 1.04           |                 |
| SCQ emotional problems           | Non-truncating       | 29       | 3.62  | 2.77           | <i>p</i> = .128 |
|                                  | Truncating           | 32       | 2.63  | 2.27           |                 |
| SCQ conduct problems             | Non-truncating       | 29       | 3.41  | 2.01           | <i>p</i> = .941 |
|                                  | Truncating           | 32       | 3.38  | 2.03           |                 |
| SCQ hyperactivity-inattention    | Non-truncating       | 29       | 6.52  | 2.23           | <i>p</i> = .491 |
|                                  | Truncating           | 32       | 6.06  | 2.83           |                 |
| SCQ peer problems                | Non-truncating       | 29       | 4.48  | 2.17           | <i>p</i> = .190 |
|                                  | Truncating           | 32       | 3.66  | 2.70           |                 |
| SCQ prosocial behavior           | Non-truncating       | 29       | 5.21  | 2.87           | <i>p</i> = .545 |
|                                  | Truncating           | 32       | 4.75  | 2.98           |                 |
| Age at seizure onset             | Non-truncating       | 48       | 10.3  | 6.35           | <i>p</i> = .506 |
|                                  | Truncating           | 34       | 11.2  | 6.20           |                 |
