# Supplementary material for: A standardized patient-centered characterization of the phenotypic spectrum of PCDH19 girls clustering epilepsy
Source: PubMed Central journal article supplement (PMC7198503; doi:10.1038/s41398-020-0803-0), 2020-05-04
Supplement: 41398_2020_803_MOESM6_ESM.pdf [file 41398_2020_803_MOESM6_ESM.pdf]

| Participant | Group                           | Variant                           | Inheritance | Novel | Relatives            |
|-------------|---------------------------------|-----------------------------------|-------------|-------|----------------------|
| 1           | Heterozygous female             | c.1091dup; p.Tyr366Leufs*10       | Unknown     |       |                      |
| 2           | Heterozygous female             | c.1335C>G; p.Asp445Glu            | Unknown     |       |                      |
| 3           | Heterozygous female             | c.1095_1096insG; p.Tyr366Valfs*10 | De novo     | Yes   |                      |
| 4           | Heterozygous female             | c.614del; p.Ser205Thrfs*7         | Maternal    | Yes   | Yes (52)             |
| 5           | Heterozygous female             | c.445_450dup; p.Pro149_Leu150dup  | Maternal    | Yes   | Yes (10,64)          |
| 6           | Mosaic male                     | c.2656C>T; p.Arg886*              | De novo     |       |                      |
| 7           | Heterozygous female             | c.1810A>C; p.Thr604Pro            | De novo     | Yes   |                      |
| 8           | Heterozygous female             | c.496_498AAA; p.Tyr166Lys         | De novo     | Yes   |                      |
| 9           | Heterozygous female             | c.370G>A; p.Asp124Asn             | Maternal    |       | Yes (42,45,53,61,62) |
| 10          | Heterozygous female             | c.445_450dup; p.Pro149_Leu150dup  | Maternal    | Yes   | Yes (5,64)           |
| 11          | Mosaic male                     | c.1720G>T; p.Glu574*              | De novo     | Yes   |                      |
| 12          | Heterozygous female             | c.1019A>G; p.Asn340Ser            | Maternal    |       | Yes (54)             |
| 13          | Heterozygous female             | c.1335C>A; p.Asp445Glu            | Maternal    |       | Yes (49)             |
| 14          | Heterozygous female             | c.1091dup; p.Tyr366Leufs*10       | Paternal    |       |                      |
| 15          | Heterozygous female             | c.1873A>G; p.Arg625Gly            | Maternal    |       | Yes (51)             |
| 16          | Mosaic male                     | c.593G>C; p.Arg198Pro             | De novo     | Yes   |                      |
| 17          | Heterozygous female             | WGD                               | De novo     |       |                      |
| 18          | Mosaic male                     | c.2147+2T>C; p.?                  | De novo     |       |                      |
| 19          | Heterozygous female             | c.2113C>T; p.Arg705*              | De novo     |       |                      |
| 20          | Heterozygous female             | c.2146dup; p.Ser716Lysfs*2        | Paternal    |       |                      |
| 21          | Heterozygous female             | c.1114C>T; p.Arg372Trp            | De novo     |       |                      |
| 22          | Heterozygous female             | c.2849-1G>C; p.?                  | Unknown     | Yes   |                      |
| 23          | Heterozygous female             | c.1469A>C; p.Tyr490Ser            | De novo     | Yes   |                      |
| 24          | Heterozygous female             | c.498C>G; p.Tyr166*               | Maternal    |       | Yes (58)             |
| 25          | Heterozygous female             | c.2341dup; p.Ile781Asnfs*3        | De novo     |       |                      |
| 26          | Heterozygous female             | c.799G>A; p.Glu267Lys             | Maternal    | Yes   | Yes (56)             |
| 27          | Heterozygous female             | c.1469A>C; p.Tyr490Cys            | Paternal    | Yes   |                      |
| 28          | Heterozygous female             | c.1240G>A; p.Glu414Lys            | Paternal    |       | Yes (63)             |
| 29          | Heterozygous female             | c.1091dup; p.Tyr366Leufs*10       | De novo     |       |                      |
| 30          | Mosaic male                     | c.688G>C; p.Asp230His             | De novo     | Yes   |                      |
| 31          | Heterozygous female             | c.1683_1696del; p.Val562Thrfs*4   | Paternal    |       | Yes (65)             |
| 32          | Heterozygous female             | WGD                               | De novo     |       |                      |
| 33          | Heterozygous female             | WGD                               | De novo     |       |                      |
| 34          | Heterozygous female             | WGD                               | Unknown     |       |                      |
| 35          | Heterozygous female             | c.518_525del; p.Leu173Profs*50    | De novo     | Yes   |                      |
| 36          | Heterozygous female             | c.497dup; p.Tyr166*               | De novo     |       | Yes (37)             |
| 37          | Heterozygous female             | c.497dup; p.Tyr166*               | De novo     |       | Yes (36)             |
| 38          | Heterozygous female             | c.593G>T; p.Arg198Leu             | De novo     |       |                      |
| 39          | Hemizygous male (with epilepsy) | c.1672G>C; p.Asp558His            | Unknown     |       |                      |
| 40          | Heterozygous female             | c.1919T>G; p.Leu640Arg            | De novo     | Yes   |                      |
| 41          | Heterozygous female             | c.1091dup; p.Tyr366Leufs*10       | Paternal    |       |                      |
| 42          | Heterozygous female             | c.370G>A; p.Asp124Asn             | Maternal    |       | Yes (9,45,53,61,62)  |
| 43          | Heterozygous female             | c.361G>C; p.Asp121His             | De novo     |       |                      |
| 44          | Heterozygous female             | c.602A>C; p.Gln201Pro             | De novo     | Yes   |                      |
| 45          | Heterozygous female             | c.370G>A; p.Asp124Asn             | Paternal    |       | Yes (9,42,53,61,62)  |
| 46          | Heterozygous female             | c.747C>C; p.Leu25Pro              | Maternal    |       | Yes (48)             |
| 47          | Hemizygous male (no epilepsy)   | c.2341dup; p.Ile781Asnfs*3        | Maternal    |       |                      |
| 48          | Heterozygous female             | c.747C>C; p.Leu25Pro              | Maternal    |       | Yes (46)             |
| 49          | Non-penetrant female            | c.1335C>A; p.Asp445Glu            | Unknown     |       | Yes (13)             |
| 50          | Heterozygous female             | c.437C>G; p.Thr146Arg             | Paternal    |       | Yes (108,109)        |
| 51          | Heterozygous female             | c.1873A>G; p.Arg625Gly            | Unknown     |       | Yes (15)             |
| 52          | Heterozygous female             | c.614del; p.Ser205Thrfs*7         | De novo     | Yes   | Yes (4)              |
| 53          | Heterozygous female             | c.370G>A; p.Asp124Asn             | Paternal    |       | Yes (9,42,45,61,62)  |
| 54          | Heterozygous female             | c.1019A>G; p.Asn340Ser            | Unknown     |       | Yes (12)             |
| 55          | Heterozygous female             | c.1671C>G; p.Asn557Lys            | Paternal    |       | Yes (57,60)          |
| 56          | Non-penetrant female            | c.799G>A; p.Glu267Lys             | Paternal    | Yes   | Yes (26)             |
| 57          | Heterozygous female             | c.1671C>G; p.Asn557Lys            | Paternal    |       | Yes (55,60)          |
| 58          | Non-penetrant female            | c.498C>G; p.Tyr166*               | Unknown     |       | Yes (24)             |
| 59          | Heterozygous female             | c.2412C>A; p.Cys804*              | Unknown     | Yes   |                      |
| 60          | Transmitting male               | c.1671C>G; p.Asn557Lys            | Unknown     |       | Yes (55,57)          |
| 61          | Transmitting male               | c.370G>A; p.Asp124Asn             | Maternal    |       | Yes (9,42,45,53,62)  |
| 62          | Non-penetrant female            | c.370G>A; p.Asp124Asn             | Paternal    |       | Yes (9,42,45,53,61)  |
| 63          | Non-penetrant mosaic male       | c.1240G>A; p.Glu414Lys            | De novo     |       | Yes (28)             |
| 64          | Heterozygous female             | c.445_450dup; p.Pro149_Leu150dup  | Unknown     | Yes   | Yes (5,10)           |
| 65          | Transmitting male               | c.1683_1696del; p.Val562Thrfs*4   | Unknown     |       | Yes (31)             |
| 66          | Heterozygous female             | c.1457del; p.Gly486Alafs*83       | De novo     | Yes   |                      |
| 67          | Mosaic male                     | c.1020T>A; p.Asn340Lys            | De novo     | Yes   |                      |
| 68          | Heterozygous female             | c.2338A>T; p.Lys780*              | De novo     |       |                      |
| 69          | Heterozygous female             | c.1942G>C; p.Gly648Arg            | De novo     | Yes   |                      |
| 70          | Heterozygous female             | c.752C>A; p.Ser251*               | De novo     | Yes   |                      |
| 71          | Heterozygous female             | c.1710_1716del; p.Asn570Lysfs*12  | De novo     | Yes   |                      |
| 72          | Mosaic male                     | c.1352C>T; p.Pro451Leu            | De novo     |       |                      |
| 73          | Heterozygous female             | c.671T>A; p.Leu224His             | De novo     | Yes   |                      |
| 74          | Heterozygous female             | c.1098C>G; p.Tyr366*              | De novo     |       |                      |
| 75          | Heterozygous female             | c.2873G>A; p.Arg958Gln            | Maternal    |       | Yes (93)             |
| 76          | Heterozygous female             | c.2617-1G>A; p.?                  | De novo     |       |                      |
| 77          | Heterozygous female             | c.1178C>T; p.Pro393Leu            | De novo     |       |                      |
| 78          | Heterozygous female             | c.2885G>A; p.Arg962Gln            | Unknown     | Yes   |                      |
| 79          | Heterozygous female             | WGD                               | De novo     |       |                      |
| 80          | Heterozygous female             | c.1091dup; p.Tyr366Leufs*10       | De novo     |       |                      |
| 81          | Heterozygous female             | c.1019A>G; p.Asn340Ser            | De novo     |       |                      |
| 82          | Heterozygous female             | c.1129G>C; p.Asp377His            | De novo     |       |                      |
| 83          | Heterozygous female             | c.2675-6A>G; p.?                  | De novo     |       |                      |
| 84          | Heterozygous female             | WGD                               | De novo     |       |                      |
| 85          | Heterozygous female             | c.779T>G; p.Leu260Arg             | De novo     | Yes   |                      |
| 86          | Heterozygous female             | c.958dup; p.Asp320Glyfs*22        | De novo     |       |                      |
| 87          | Heterozygous female             | c.1159delC; p.Arg387Valfs*135     | Unknown     | Yes   |                      |
| 88          | Heterozygous female             | c.706C>T; p.Pro236Ser             | De novo     |       |                      |
| 89          | Heterozygous female             | c.1973T>G; p.Val658Gly            | Maternal    | Yes   | Yes (97,98,99)       |
| 90          | Heterozygous female             | c.1463T>A; p.Val488Asp            | Paternal    | Yes   | Yes (96)             |
| 91          | Heterozygous female             | c.136G>C; p.Ala46Pro              | Paternal    | Yes   |                      |
| 92          | Heterozygous female             | c.1298T>C; p.Leu433Pro            | De novo     |       |                      |
| 93          | Non-penetrant female            | c.2873G>A; p.Arg958Gln            | Unknown     |       | Yes (75)             |
| 94          | Heterozygous female             | c.1019A>G; p.Asn340Ser            | De novo     |       | Yes (95)             |
| 95          | Heterozygous female             | c.1019A>G; p.Asn340Ser            | Maternal    |       | Yes (94)             |
| 96          | Transmitting male               | c.1463T>A; p.Val488Asp            | Unknown     | Yes   | Yes (90)             |
| 97          | Non-penetrant female            | c.1973T>G; p.Val658Gly            | Maternal    | Yes   | Yes (89,98,99)       |
| 98          | Heterozygous female             | c.1973T>G; p.Val658Gly            | Maternal    | Yes   | Yes (89,97,99)       |
| 99          | Non-penetrant female            | c.1973T>G; p.Val658Gly            | Unknown     | Yes   | Yes (89,97,98)       |
| 100         | Heterozygous female             | c.971del; p.Asn324Ilefs*44        | Maternal    | Yes   |                      |
| 101         | Heterozygous female             | c.1958_1959del; p.Ser653Cysfs*64  | De novo     | Yes   |                      |
| 102         | Heterozygous female             | c.1091del; p.Pro364Argfs*4        | De novo     |       |                      |
| 103         | Heterozygous female             | c.2656C>T; p.Arg886*              | De novo     |       |                      |
| 104         | Heterozygous female             | c.2501dup; p.Asn834Lysfs*13       | Unknown     | Yes   |                      |
| 105         | Heterozygous female             | c.1091dup; p.Tyr366Leufs*10       | De novo     |       |                      |
| 106         | Heterozygous female             | c.2019del; p.Ser674Leufs*2        | De novo     |       |                      |
| 107         | Heterozygous female             | c.52C>T; p.Gln18*                 | De novo     | Yes   |                      |
| 108         | Heterozygous female             | c.437C>G; p.Thr146Arg             | Paternal    |       | Yes (50,109)         |
| 109         | Heterozygous female             | c.437C>G; p.Thr146Arg             | Paternal    |       | Yes (50,108)         |
| 110         | Heterozygous female             | c.745del; p.Glu249Lysfs*56        | De novo     | Yes   |                      |
| 111         | Heterozygous female             | c.968C>T; p.Pro323Leu             | Paternal    | Yes   |                      |
| 112         | Mosaic male                     | c.1548C>A; p.Tyr516*              | Unknown     | Yes   |                      |
